# Supplementary material for: Risk assessment according to IPSS-M is superior to AML ELN risk classification in MDS/AML overlap patients defined by ICC
Source: PubMed Central journal article supplement (PMC10539168; doi:10.1038/s41375-023-02004-w), 2023-08-12
Supplement: 41375_2023_2004_MOESM1_ESM.pdf [file 41375_2023_2004_MOESM1_ESM.pdf]

## **Supplementary Material**

### **Supplementary Methods**

#### ***Patients cohort and samples***

All MDS/AML samples were sent to the MLL Munich Leukemia Laboratory between 09/2000 and 07/2009. Diagnoses (from peripheral blood and bone marrow) were made based on cytomorphology, cytogenetics and molecular genetics as previously published [1-3].

#### ***Whole genome and whole transcriptome sequencing (WGS, WTS)***

WGS and WTS analysis were performed for all patients. For WGS, total genomic DNA was extracted from lysed cell pellet of bone marrow or peripheral blood using the MagNA Pure 96 with DNA and Viral Nucleic Acid Large Volume Kit and Cellular RNA Large Volume Kit (Roche, Basel, Switzerland). Library preparation and sequencing as well as calling and filtering of single nucleotide variants, structural variants and somatic copy number variations (CNVs) were performed as previously described [4, 5]. Copy neutral loss of heterozygosity (CN-LOH) was assessed using HadoopCNV [6]. WTS was performed as described therein [7]. Fusion calling was performed with Manta (v0.29.0) [8], Arriba (v1.2.0) [9] and STAR-Fusion (v1.9.0) [10].

#### ***Mutational analysis***

Mutational data was retrieved from WGS data or during routine work-up. Structural variants/ fusions were analyzed by combining routine cytogenetics (encompassing chromosome banding analyses and FISH) and WTS.

#### ***Statistical analysis***

For statistical analyses R version 4.2.2 (R Foundation for Statistical Computing, Vienna, Austria) with the survival and survminer packages was used.

## Supplementary Results

### Supplementary Tables and Figures

**Table S1. MDS/AML cohort overview**

| <b>Characteristics</b>                                      | <b>MDS/AML cases (n = 137)</b> |
|-------------------------------------------------------------|--------------------------------|
| <b>Age</b> (years; median [range])                          | 74 [32-91]                     |
| <b>Sex</b> (female / male)                                  | 58 (42%) / 79 (58%)            |
| <b>Bone marrow blast count</b> (%; median [range])          | 13 [10-19]                     |
| <b>Karyotype</b> (normal / aberrant)                        | 71 (52%) / 66 (48%)            |
| <b>IPSS-R cytogenetic risk group</b>                        | <b>Number of samples (%)</b>   |
| Very poor                                                   | 24 (17)                        |
| Poor                                                        | 9 (7)                          |
| Intermediate                                                | 22 (16)                        |
| Good                                                        | 73 (53)                        |
| Very good                                                   | 9 (7)                          |
| <b>ICC diagnosis</b>                                        |                                |
| MDS/AML with mutated <i>TP53</i> (MDS/AML- <i>TP53</i> )    | 19 (14)                        |
| MDS/AML with MR gene mutations (MDS/AML-MR mut)             | 99 (72)                        |
| MDS/AML with MR cytogenetic abnormalities (MDS/AML-MR cyto) | 6 (4)                          |
| MDS/AML, not otherwise specified (MDS/AML-NOS)              | 13 (10)                        |
| <b>Clinical data</b>                                        |                                |
| Treatment data - availability                               | 127 (93)                       |
| Intensive chemotherapy                                      | 18 (14)                        |
| Allogeneic HSCT                                             | 10 (8)                         |
| Not intensive chemotherapy                                  | 45 (35)                        |
| Supportive treatment                                        | 29 (23)                        |
| None                                                        | 35 (28)                        |
| Response data - availability                                | 104 (76)                       |
| CR reached                                                  | 13 (13)                        |
| Progress to AML                                             | 45 (33)                        |

MR: myelodysplasia-related; HSCT: hematopoietic stem cell transplantation; CR: complete remission.

**Table S2. MDS cohort overview (without overlapping 116 MDS/AML cases)**

| <b>Characteristics</b>                                                | <b>MDS cases (n = 510)</b>   |
|-----------------------------------------------------------------------|------------------------------|
| <b>Age</b> (years; median [range])                                    | 73 [23-85]                   |
| <b>Sex</b> (female / male)                                            | 214 (42%) / 296 (58%)        |
| <b>Bone marrow blast count</b> (%; median [range])                    | 3 [0-19]                     |
| <b>Karyotype</b> (normal / aberrant)                                  | 310 (61%) / 200 (39%)        |
| <b>IPSS-R cytogenetic risk group</b>                                  | <b>Number of samples (%)</b> |
| Very poor                                                             | 20 (4)                       |
| Poor                                                                  | 18 (3)                       |
| Intermediate                                                          | 39 (8)                       |
| Good                                                                  | 402 (79)                     |
| Very good                                                             | 31 (6)                       |
| <b>WHO 2017 diagnosis</b>                                             |                              |
| MDS with single lineage dysplasia (MDS-SLD)                           | 20 (4)                       |
| MDS with multilineage dysplasia (MDS-MLD)                             | 97 (19)                      |
| MDS with single lineage dysplasia with ring sideroblasts (MDS-RS-SLD) | 47 (9)                       |
| MDS with multilineage dysplasia with ring sideroblasts (MDS-RS-MLD)   | 128 (25)                     |
| MDS with isolated del(5q) (MDS 5q-)                                   | 87 (17)                      |
| MDS with excess blasts (MDS-EB-1)                                     | 119 (23)                     |
| MDS with excess blasts (MDS-EB-2)                                     | 12 (3)                       |
| <b>Clinical data</b>                                                  |                              |
| Treatment data - availability                                         | 497 (97)                     |
| Intensive chemotherapy                                                | 26 (5)                       |
| Allogeneic HSCT                                                       | 21 (4)                       |
| Not intensive chemotherapy                                            | 123 (25)                     |
| Supportive treatment                                                  | 192 (39)                     |
| None                                                                  | 137 (27)                     |
| Response data - availability                                          | 399 (78)                     |
| CR reached                                                            | 26 (7)                       |
| Progress to AML                                                       | 48 (9)                       |

HSCT: hematopoietic stem cell transplantation; CR: complete remission.

**Table S3. AML cohort overview**

| <b>Characteristics</b>                             | <b>AML cases (n = 686)</b>   |
|----------------------------------------------------|------------------------------|
| <b>Age</b> (years; median [range])                 | 69 [2-93]                    |
| <b>Sex</b> (female / male)                         | 306 (45%) / 380 (55%)        |
| <b>Bone marrow blast count</b> (%; median [range]) | 66 [1-99]                    |
| <b>Karyotype</b> (normal / aberrant)               | 268 (39%) / 418 (61%)        |
| <b>WHO 2022 diagnosis</b>                          | <b>Number of samples (%)</b> |
| AML with <i>RUNX1::RUNX1T1</i> fusion              | 41 (6)                       |
| AML with <i>CBFB::MYH11</i> fusion                 | 45 (7)                       |
| AML with <i>DEK::NUP214</i> fusion                 | 15 (2)                       |
| AML with <i>KMT2A</i> rearrangement                | 44 (6)                       |
| AML with <i>MECOM</i> rearrangement                | 64 (9)                       |
| AML with <i>NUP98</i> rearrangement                | 5 (1)                        |
| AML with <i>NPM1</i> mutation                      | 166 (24)                     |
| AML with <i>CEBPA</i> mutation                     | 61 (9)                       |
| AML-MR                                             | 208 (30)                     |
| AML with other defined genetic alterations         | 1 (0)                        |
| AML defined by differentiation                     | 36 (5)                       |
| <b>Clinical data</b>                               |                              |
| Treatment data - availability                      | 597 (87)                     |
| Intensive chemotherapy                             | 412 (69)                     |
| Allogeneic HSCT                                    | 156 (38)                     |
| Not intensive chemotherapy                         | 108 (18)                     |
| Supportive treatment                               | 66 (11)                      |
| Unspecified                                        | 11 (2)                       |
| Response data - availability                       | 586 (85)                     |
| CR reached                                         | 320 (55)                     |
| Post-MDS or MDS/MPN *                              | 34 (5)                       |
| Prior MDS or MDS/MPN treatment data – availability | 29 (85)                      |
| Not intensive chemotherapy                         | 8 (28)                       |
| Supportive treatment                               | 11 (38)                      |
| None                                               | 10 (34)                      |

MR: myelodysplasia-related; HSCT: hematopoietic stem cell transplantation; CR: complete remission.  
 \* Prior MDS or MDS/MPN treatment did not impact on survival analysis of the AML cohort stratified for ELN risk categories.

**Table S4. Characteristics of cases within *TP53* mutated entities**

| <b>Characteristics</b>           | <b>MDS/AML-<i>TP53</i><br/>cases (n=19)</b> | <b>MDS-<i>TP53</i> cases*<br/>(n=15)</b> | <b>AML-<i>TP53</i> cases<br/>(n=48)</b> |
|----------------------------------|---------------------------------------------|------------------------------------------|-----------------------------------------|
| Complex karyotype                | 19; 100%                                    | 14; 93%                                  | 44; 92%                                 |
| <i>TP53</i> monoallelic          | 0; 0%                                       | 0 (per definitionem)                     | 2; 4%                                   |
| <i>TP53</i> biallelic            | 19; 100%                                    | 15; 100%                                 | 46; 96%                                 |
| Two mutations                    | 3                                           | 5**                                      | 11                                      |
| Mutation + deletion              | 8                                           | 6                                        | 24                                      |
| Mutation + CN-LOH                | 8                                           | 4                                        | 11                                      |
| Median <i>TP53</i> VAF % (range) | 60 (17-93)                                  | 40 (4-96)                                | 71 (20-99)                              |

CN-LOH: Copy neutral loss of heterozygosity; VAF: Variant allelic frequency; \* without overlapping 19 MDS/AML cases; \*\* including 2 cases with both *TP53* VAFs <10% (fulfilling WHO 2022 entity criteria, but not ICC entity criteria)

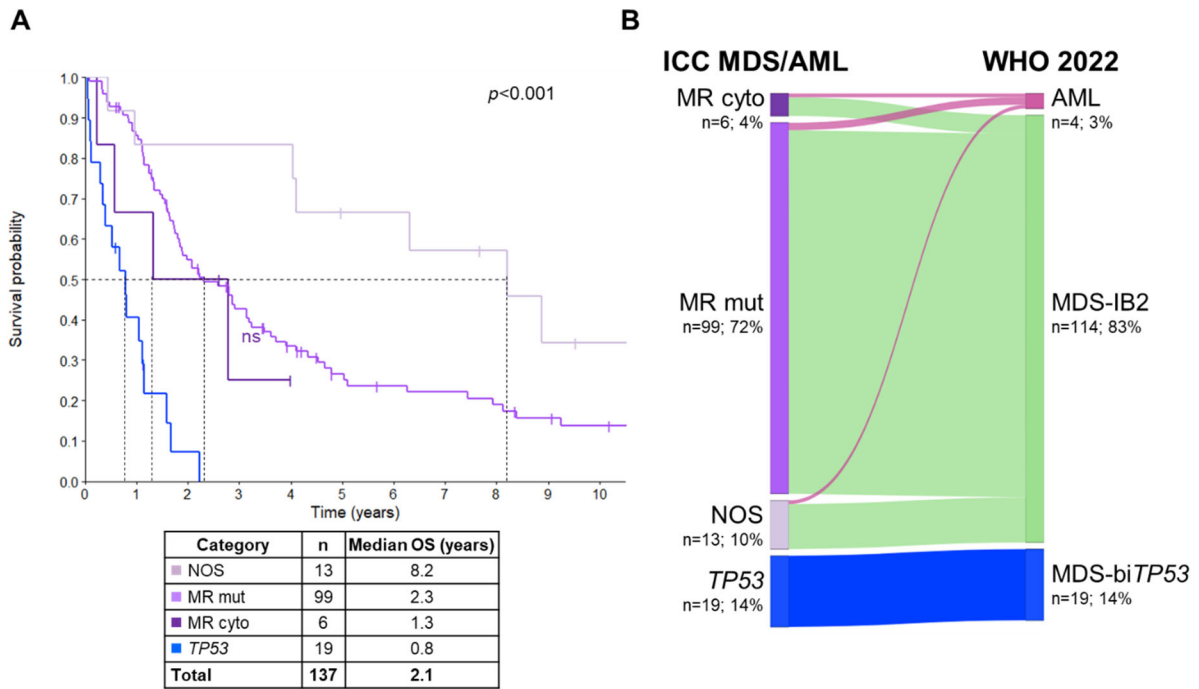

**Supplementary Figures S1: Survival and subgroups of MDS/AML overlap patients. (A)** Overall survival (OS) of the MDS/AML cohort (n=137) according to ICC subgroups. **(B)** Relationship of MDS/AML subgroups and corresponding WHO 2022 diagnosis. NOS: not otherwise specified; MR: myelodysplasia-related; mut: gene mutation; cyto: cytogenetic abnormality; *TP53*: mutated *TP53*; ns: not significant.

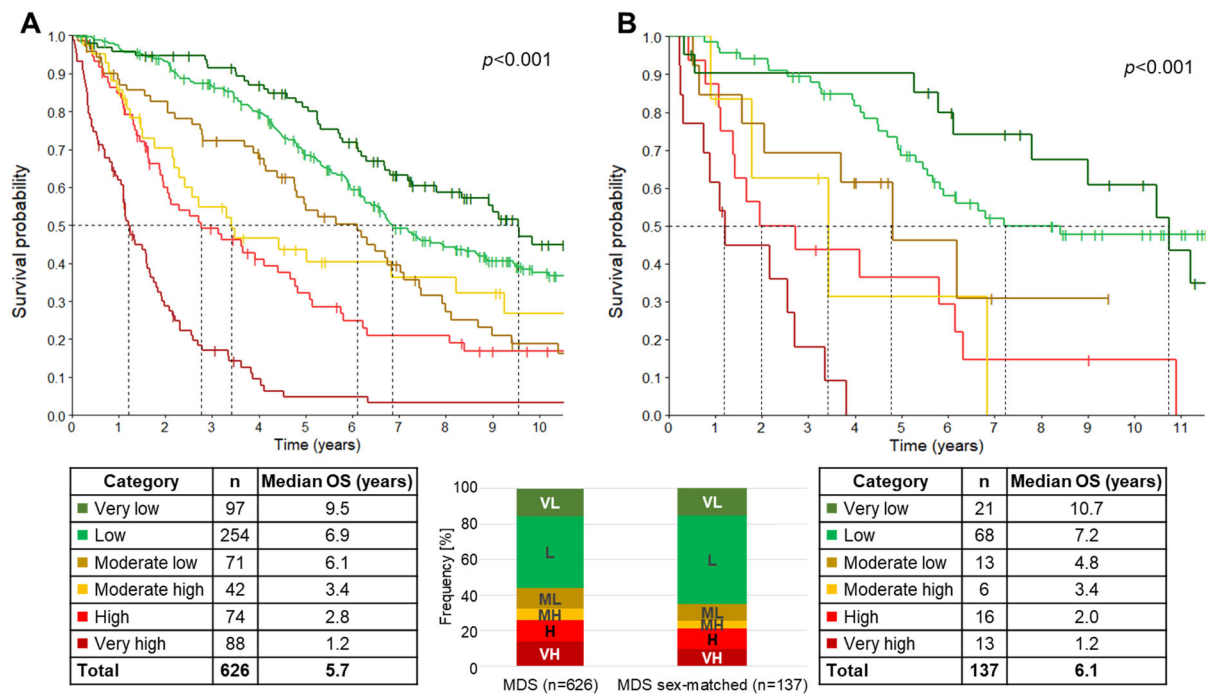

**Supplementary Figures S2:** Survival and frequencies of IPSS-M risk categories of MDS control cohorts. **(A)** Overall survival (OS) of a *bona fide* MDS control cohort ([11]; n=626) according to IPSS-M risk categories. **(B)** OS of a sex-matched MDS cohort (n=137) according to IPSS-M risk categories. VL: very low, L: low, ML: moderate low, MH: moderate high, H: high, VH: very high.

## References

1. Schoch C, Schnittger S, Bursch S, Gerstner D, Hochhaus A, Berger U, et al. Comparison of chromosome banding analysis, interphase- and hypermetaphase-FISH, qualitative and quantitative PCR for diagnosis and for follow-up in chronic myeloid leukemia: a study on 350 cases. *Leukemia*. 2002;16(1):53-9.
2. Haferlach T, Kern W, Schoch C, Hiddemann W, Sauerland MC. Morphologic dysplasia in acute myeloid leukemia: importance of granulocytic dysplasia. *J Clin Oncol*. 2003;21(15):3004-5.
3. Kern W, Voskova D, Schoch C, Hiddemann W, Schnittger S, Haferlach T. Determination of relapse risk based on assessment of minimal residual disease during complete remission by multiparameter flow cytometry in unselected patients with acute myeloid leukemia. *Blood*. 2004;104(10):3078-85.
4. Höllein A, Twardziok SO, Walter W, Hutter S, Baer C, Hernandez-Sanchez JM, et al. The combination of WGS and RNA-Seq is superior to conventional diagnostic tests in multiple myeloma: Ready for prime time? *Cancer Genet*. 2020;242:15-24.
5. Stengel A, Baer C, Walter W, Meggendorfer M, Kern W, Haferlach T, et al. Mutational patterns and their correlation to CHIP-related mutations and age in hematological malignancies. *Blood Adv*. 2021;5(21):4426-34.
6. Yang H, Chen G, Lima L, Fang H, Jimenez L, Li M, et al. HadoopCNV: A dynamic programming imputation algorithm to detect copy number variants from sequencing data. *bioRxiv*. 2017:124339.
7. Stengel A, Shahswar R, Haferlach T, Walter W, Hutter S, Meggendorfer M, et al. Whole transcriptome sequencing detects a large number of novel fusion transcripts in patients with AML and MDS. *Blood Adv*. 2020;4(21):5393-401.



8. Chen X, Schulz-Trieglaff O, Shaw R, Barnes B, Schlesinger F, Källberg M, et al. Manta: rapid detection of structural variants and indels for germline and cancer sequencing applications. *Bioinformatics*. 2016;32(8):1220-2.
9. Uhrig S, Ellermann J, Walther T, Burkhardt P, Fröhlich M, Hutter B, et al. Accurate and efficient detection of gene fusions from RNA sequencing data. *Genome Research*. 2021;31(3):448-60.
10. Haas BJ, Dobin A, Li B, Stransky N, Pochet N, Regev A. Accuracy assessment of fusion transcript detection via read-mapping and de novo fusion transcript assembly-based methods. *Genome Biology*. 2019;20(1):213.
11. Baer C, Huber S, Hutter S, Meggendorfer M, Nadarajah N, Walter W, et al. Risk prediction in MDS: independent validation of the IPSS-M-ready for routine? *Leukemia*. 2023;doi:10.1038/s41375-023-01831-1.
